# Supplementary material
Source: PubMed Central journal article supplement (PMC2268164)
Supplement: supp_0712031105_12031Fig4.pdf [file supp_0712031105_12031Fig4.pdf]

**Table 4. Effect of time and sex on survival probability of king penguins from Crozet Islands**

| Models                              | DEV             | $\Delta AIC_i$ | NP       | wi            |
|-------------------------------------|-----------------|----------------|----------|---------------|
| $[ P_i \phi_t ]$                    | 1,422.84        | 9.23           | 8        | 0.0053        |
| $[ P_i \phi_s ]$                    | 1,453.58        | 25.97          | 1        | 0.0000        |
| $[ P_i \phi_i ]$                    | 1,453.58        | 25.97          | 1        | 0.0000        |
| $[ P_i \phi_{t*s} ]$                | 1,419.23        | 21.62          | 16       | 0.0000        |
| $[ P_i \phi_{t+s} ]$                | 1,422.56        | 10.95          | 9        | 0.0022        |
| $[ P_i \phi_{t(26,137,458)} ]$      | <b>1,423.61</b> | <b>0.00</b>    | <b>3</b> | <b>0.5326</b> |
| $[ P_i \phi_{t(137,458)+t(26)+s} ]$ | 1,423.32        | 1.71           | 4        | 0.2264        |
| $[ P_i \phi_{t(137,458)+t(26)*s} ]$ | 1,423.26        | 1.65           | 4        | 0.2335        |

$\phi$  , survival probability;  $P$ , recapture probability;  $i$ , constant;  $t$ , time dependence;  $s$ , sex effect;

+, additive model; \*, model with interaction; DEV, Deviance; NP, Number of estimated parameters, wi: AIC weight;  $\Delta AIC_i$ , Difference in value between AIC (Akaike's Information Criterion) of the most parsimonious model and the model in question.

The AIC weight ( $w_i$ ) with the highest value indicates the best model (shown in bold).

Numbers from 1 to 8 correspond to the years (from 1998 to 2005). Years 2 (1999) and 6 (2003) = bad years.
